# Supplementary material for: Recurrent Fusions in MYB and MYBL1 Define a Common, Transcription Factor–Driven Oncogenic Pathway in Salivary Gland Adenoid Cystic Carcinoma
Source: Oxford University Press journal article supplement (doi:10.1158/2159-8290.cd-15-0859), 2015-12-02
Supplement: 21598290cd150859-sup-152674_3_supp_3239695_ny2cqk.xlsx [file 21598290cd150859-sup-152674_3_supp_3239695_ny2cqk.xlsx]

## Sheet: Significant_genes2.txt
TableS6: Differentially-Expressed Genes, Group 2 vs. Normal
ID	EntrezGene	Symbol	logFC	FC	PValue	AdjPVal	T013	T192	T229	T263	T349	T364	T399	T406	T411	T430	T440	T441	T452	T485	T042	T072	T074	T087	T060	T115	NSal3477	NSal3753	NSal3977	NSal4200	NSal4589
NM_002274	3860	KRT13	-14.0273	16697.3	1.58993e-06	0.000996177	0	58	3	1	2	1	1	8	6	466	19	1	1376	2	0	20	5	19	4373	1	0	0	0	0	0
NM_002272	3851	KRT4	-13.0486	8472.76	4.42279e-07	0.000383694	0	2	0	2	3	2	4	18	4	70	5	1	531	0	1	12	9	16	2221	1	0	0	0	0	0
NM_005416	6707	SPRR3	-11.5753	3051.54	0.000202486	0.0208335	0	2	0	1	3	0	1	6	0	170	5	0	847	0	0	4	4	4	800	0	0	0	0	0	0
NM_016190	49860	CRNN	-11.1937	2342.28	1.85485e-06	0.001101	0	3	0	1	2	0	1	12	0	41	12	1	124	0	2	7	9	15	613	0	0	0	0	0	0
NM_003245	7053	TGM3	-10.296	1257.16	2.28889e-05	0.00516282	0	3	3	1	5	0	2	23	0	42	15	0	260	0	0	11	7	7	324	0	0	0	0	0	0
NM_005213	1475	CSTA	-9.67271	816.161	2.18562e-07	0.000273882	2	3	8	3	20	0	10	16	6	80	7	23	186	1	0	4	5	7	180	8	0	0	0	0	0
NR_038291	100507127	LINC00707	-9.61524	784.29	4.99195e-08	8.04275e-05	92	16	1	19	51	0	73	6	1	6	36	5	31	1	16	13	5	16	199	2	0	0	0	0	0
NM_005554	3853	KRT6A	-9.519	733.676	9.71911e-05	0.012421	0	3	2	2	142	2	10	38	1	504	12	1	1073	0	0	12	10	8	708	1	0	0	0	1	0
NM_001160706	8796	SCEL	-9.40081	675.967	1.00857e-06	0.000738424	0	4	1	6	18	2	21	97	0	57	5	7	151	0	4	7	37	10	169	2	0	0	0	0	0
NM_002371	4118	MAL	-9.30857	634.101	7.59981e-07	0.000612219	0	4	4	1	4	0	2	4	24	6	5	2	62	2	0	4	6	13	157	0	0	0	0	0	0
NM_005547	3713	IVL	-8.92411	485.764	1.54765e-05	0.00436359	0	2	0	2	42	0	3	11	4	44	5	1	152	0	6	4	8	3	126	2	0	0	0	0	0
NM_001256299	1394	CRHR1	-8.77864	439.173	1.37699e-08	2.83143e-05	8	7	1	19	39	0	16	24	13	7	8	3	2	0	15	19	15	23	110	20	0	0	0	0	0
NM_173086	286887	KRT6C	-8.62335	394.355	0.000653691	0.0398504	0	3	0	1	62	0	1	4	2	248	9	0	242	0	0	5	5	7	103	0	0	0	0	0	0
NM_001332	1501	CTNND2	-8.48312	357.828	1.13414e-07	0.000159885	2	19	3	46	139	24	41	53	7	16	8	1	10	0	54	64	31	55	87	20	0	0	0	0	0
NM_001199143	129446	XIRP2	-8.47276	355.266	0.000513162	0.0361715	36	77	4	904	2	0	6	7678	7	5	11	79	2947	0	9	33	15	33	19	2	0	0	0	0	0
NM_003125	6699	SPRR1B	-8.44178	347.718	0.000419148	0.0310997	0	2	1	1	22	0	1	20	0	121	5	0	249	0	1	4	3	6	89	0	0	0	0	0	0
NM_001025357	441376	AARD	-8.20897	295.9	1.2707e-06	0.000842998	26	24	0	31	54	12	41	4	0	16	187	1	43	0	28	25	18	20	76	15	0	0	0	0	0
NM_004455	2134	EXTL1	-8.03121	261.599	2.65458e-05	0.00559463	2	17	0	6	50	2	25	23	1	1	21	0	18	0	90	4	16	34	68	13	0	0	0	0	0
NM_000359	7051	TGM1	-8.00496	256.882	1.23789e-05	0.00387805	2	3	1	2	10	2	18	4	3	20	8	0	129	0	7	29	18	28	65	0	0	0	0	0	0
NM_182587	285175	UNC80	-7.95196	247.616	2.21852e-06	0.00119145	4	7	17	4	4	1	5	13	15	0	6	12	3	0	11	4	53	83	25	6	0	0	0	0	0
NM_009586	6493	SIM2	-7.64866	200.666	1.50634e-08	2.83143e-05	0	9	1	26	10	6	37	28	9	38	8	263	50	3	59	6	13	28	73	4	0	0	0	0	2
NM_005987	6698	SPRR1A	-7.49164	179.973	0.00082884	0.0460104	0	2	1	1	6	0	1	4	0	55	5	0	124	0	1	4	4	12	45	0	0	0	0	0	0
NM_144766	6003	RGS13	-7.4759	178.021	2.24573e-05	0.00516282	1	4	12	3	3	0	2	21	23	8	5	29	4	0	5	4	2	3	1	0	0	0	0	0	0
NM_198460	163351	GBP6	-7.42385	171.713	1.29977e-05	0.00394763	0	9	0	3	8	0	1	8	1	42	5	5	102	0	6	23	5	21	288	1	0	1	0	1	0
NM_018922	56104	PCDHGB1	-7.2973	157.292	1.1801e-05	0.00380261	81	12	1	2	37	1	19	49	6	11	19	8	58	0	2	5	21	24	32	0	0	0	0	0	0
NM_013962	3084	NRG1	-7.28975	156.471	2.85679e-10	1.61095e-06	20	9	4	2	12	2	42	8	3	20	21	23	34	14	3	19	31	17	859	24	0	0	0	0	10
NM_006536	9635	CLCA2	-7.23044	150.169	0.000375135	0.0288212	0	7	0	3	23	0	2	51	0	44	10	1	91	0	3	4	11	10	38	0	0	0	0	0	0
NM_003986	8424	BBOX1	-7.22596	149.703	5.2967e-05	0.00818304	2	2	1	6	5	0	8	29	0	18	5	14	20	0	0	8	31	22	25	0	0	0	0	0	0
NR_003255	9383	TSIX	-7.07307	134.65	2.19712e-05	0.00516282	14	3	13	7	12	11	3	32	44	0	28	14	0	18	8	7	91	48	1	15	0	0	0	0	0
NR_033770	727758	ROCK1P1	-6.99996	127.996	0.000241606	0.0228977	0	5	19	2	3	8	4	44	33	3	24	1	0	1	32	68	94	85	0	3	0	0	0	0	0
NM_144670	144568	A2ML1	-6.76181	108.52	6.04846e-05	0.00909527	0	5	0	3	18	0	8	5	6	42	8	1	127	0	7	4	25	34	303	0	0	2	0	0	2
NM_001884	1404	HAPLN1	-6.61867	98.2694	0.000170243	0.0192001	26	15	2	2	6	81	206	10	1	132	165	22	16	66	4	4	254	39	3	196	0	0	0	0	0
NM_012397	5275	SERPINB13	-6.594	96.6036	0.000175481	0.0195948	0	7	0	2	11	0	3	11	3	24	8	4	93	0	0	10	6	15	80	0	0	0	0	0	1
NM_178229	128239	IQGAP3	-6.51537	91.4794	3.91348e-06	0.00176545	5	7	4	54	148	7	27	16	6	41	27	9	62	7	10	34	20	25	9	14	0	0	0	0	0
NM_001372	1770	DNAH9	-6.47201	88.7708	0.00074709	0.0429882	0	4	12	3	6	0	4	8	15	0	12	2	2	0	13	17	33	34	1	0	0	0	0	0	0
NM_020445	57180	ACTR3B	-6.45321	87.6216	2.61479e-06	0.00128216	13	33	2	20	66	9	37	12	2	22	53	1	27	9	9	9	26	28	18	12	0	0	0	0	0
NM_004336	699	BUB1	-6.43229	86.3599	1.86166e-05	0.00477178	0	9	6	48	75	8	26	4	16	20	32	12	56	3	5	11	47	10	2	13	0	0	0	0	0
NM_033197	92747	BPIFB1	-6.40696	84.8571	3.37939e-05	0.00629135	0	20	3	1	2	2	1	5	0	27	5	472	135	7	4	7	10	5	3	1	0	2	0	0	6
NM_001165931	6241	RRM2	-6.40276	84.6099	1.8224e-05	0.00477178	4	11	4	42	78	3	14	6	15	8	38	7	29	0	3	21	13	19	9	3	0	0	0	0	0
NM_014875	9928	KIF14	-6.36172	82.2372	2.79678e-05	0.00573492	3	8	1	64	155	6	22	9	16	17	25	14	60	0	23	14	39	25	7	19	0	0	0	0	0
NM_178842	204219	CERS3	-6.33076	80.4911	6.28392e-05	0.00932501	3	5	1	4	6	5	38	26	6	3	8	2	78	0	2	37	11	29	17	6	0	0	0	0	0
NM_002471	4624	MYH6	-6.32673	80.2666	0.000822043	0.045896	0	34	4	49	2	1	3	46	7	0	7	1	4	0	2	6	21	15	13	0	0	0	0	0	0
NM_012194	25758	KIAA1549L	-6.25294	76.2644	2.55021e-11	2.87613e-07	41	18	4	32	150	48	73	92	16	32	48	12	111	29	61	82	70	59	205	97	2	0	0	0	2
NM_024798	79856	SNX22	-6.18427	72.7194	1.97508e-09	7.42499e-06	4	26	9	24	26	13	70	21	38	33	84	22	32	9	62	58	58	37	758	55	2	0	4	0	7
NM_001159522	442319	ZNF727P	-6.07261	67.3035	2.67875e-05	0.00559463	27	20	3	24	65	8	62	11	5	15	21	6	17	0	0	31	18	35	7	23	0	0	0	0	0
NM_001114387	339967	TMPRSS11A	-6.03871	65.7404	0.000188099	0.0203979	1	3	3	7	20	0	7	6	1	6	5	0	74	0	0	41	6	6	52	3	0	0	0	0	1
NM_001258366	81624	DIAPH3	-6.00784	64.3488	9.80196e-05	0.012421	3	9	4	41	120	7	19	24	8	4	15	8	50	0	6	6	37	25	3	8	0	0	0	0	0
NM_001256689	9833	MELK	-5.98066	63.1479	0.000208742	0.0208335	0	3	8	31	54	0	27	27	12	29	17	4	41	3	3	12	39	17	0	12	0	0	0	0	0
NM_015082	23105	FSTL4	-5.98008	63.1224	0.000374936	0.0288212	21	38	0	9	16	62	16	13	2	7	9	1	28	60	2	12	74	10	15	40	0	0	0	0	0
NM_022909	64946	CENPH	-5.95114	61.8687	8.34262e-05	0.0114688	5	6	8	22	68	5	10	15	9	19	27	4	19	1	6	13	22	19	0	5	0	0	0	0	0
NM_007191	11197	WIF1	-5.91496	60.3364	0.00025261	0.0237202	0	26	0	3	2	14	2	4	0	2	8	17	0	8	0	7	3	10	1381	0	0	11	1	0	29
NM_001944	1830	DSG3	-5.84719	57.5676	0.000340817	0.0280565	0	3	0	9	138	10	42	59	2	205	6	9	611	3	66	12	43	7	345	10	0	4	0	0	6
NM_138555	9493	KIF23	-5.82935	56.8604	4.73496e-05	0.00785308	14	21	1	66	148	20	42	20	17	33	16	13	89	23	3	32	42	32	1	21	0	0	0	0	0
NM_001083619	2891	GRIA2	-5.67974	51.2592	6.28955e-06	0.00262717	0	26	2	1	3	0	4	5	4	11	34	115	11	3	7	5	14	42	137	0	0	5	0	1	0
NM_001201465	81832	NETO1	-5.66391	50.6998	0.000203471	0.0208335	0	4	3	3	12	0	3	10	50	4	7	8	1	0	15	17	12	23	87	0	0	0	0	0	3
NM_152562	157313	CDCA2	-5.58847	48.117	0.000798209	0.0447871	3	3	5	47	110	6	13	18	4	6	34	5	28	0	7	14	22	6	0	5	0	0	0	0	0
NM_000959	5737	PTGFR	-5.5471	46.7566	0.000129651	0.0157226	0	3	4	29	19	1	5	47	12	0	17	28	23	1	7	4	13	3	14	0	0	0	0	1	0
NR_026812	80215	RUNX1-IT1	-5.48418	44.7613	4.48839e-05	0.00755524	3	3	17	7	13	24	182	29	34	40	6	11	37	12	2	13	57	5	2	38	0	0	0	0	1
NR_073375	4171	MCM2	-5.4467	43.6134	0.000366487	0.0288212	8	10	0	27	69	4	20	19	8	23	21	12	40	2	6	116	14	35	0	11	0	0	0	0	0
NM_207361	341640	FREM2	-5.41838	42.7655	7.66769e-06	0.00298194	4	22	3	52	11	9	10	55	6	10	67	2	45	18	30	11	21	37	34	4	0	1	0	0	0
NM_022068	63895	PIEZO2	-5.31083	39.6935	2.99125e-07	0.000281127	216	10	19	66	58	4	288	91	22	104	22	71	81	1	47	50	50	61	83	47	4	0	0	1	1
NR_033768	100379220	TMED11P	-5.22783	37.4743	0.000660423	0.0400443	24	11	1	3	46	2	35	4	6	19	10	3	21	3	6	41	10	21	5	26	0	0	0	0	0
NR_104136	101927288	MANEA-AS1	-5.19637	36.6659	2.51071e-05	0.00544534	6	3	26	6	7	0	16	4	24	2	5	14	38	0	7	7	8	7	6	8	0	2	0	0	0
NM_005555	3854	KRT6B	-5.16438	35.862	0.000411516	0.0307356	17	16	0	6	44	18	29	10	0	146	6	4	135	2	0	31	15	9	85	15	0	0	0	0	4
NM_001168221	151254	ALS2CR11	-5.14413	35.3621	0.000693708	0.0413949	20	19	3	9	9	9	35	12	2	21	8	5	41	10	9	11	30	34	0	18	0	0	0	0	0
NM_004319	460	ASTN1	-5.04853	33.0947	0.000337118	0.027956	0	6	2	14	10	13	4	13	2	4	6	1	8	0	15	11	13	68	52	3	0	2	0	0	0
NM_014331	23657	SLC7A11	-5.02559	32.5726	0.000552338	0.0379833	0	13	12	28	5	0	5	6	1	10	11	18	11	0	2	6	13	16	1	3	0	0	1	0	0
NM_031913	83850	ESYT3	-4.9885	31.7458	4.85879e-09	1.36994e-05	18	15	3	44	39	14	15	12	6	7	40	65	39	15	15	23	33	21	53	3	1	0	0	2	2
NM_001253850	79679	VTCN1	-4.96719	31.2804	0.000204371	0.0208335	202	69	0	191	362	21	281	62	0	45	241	2	151	17	122	82	130	172	629	116	26	0	0	0	3
NM_019106	55964	2015-09-03	-4.91688	30.2085	1.0476e-06	0.000738424	2	15	5	20	29	6	17	17	7	4	43	10	41	1	21	35	22	23	29	7	0	0	0	0	2
NM_053055	117145	THEM4	-4.79165	27.6969	2.81834e-07	0.000281127	2	15	24	27	30	6	19	17	30	15	30	25	14	0	1	32	7	31	23	17	0	0	0	4	0
NM_001127698	11005	SPINK5	-4.79082	27.6809	0.000368035	0.0288212	61	10	4	17	58	0	153	167	8	107	6	14	579	3	1	11	21	9	536	2	4	6	2	7	9
NM_001029875	401190	RGS7BP	-4.76749	27.237	0.000322799	0.0271969	22	10	4	5	2	0	14	10	1	17	44	8	4	0	0	9	8	31	26	16	0	0	0	0	2
NM_001191323	26585	GREM1	-4.74604	26.835	3.09422e-05	0.00601666	11	18	31	23	362	0	5	43	42	57	24	74	351	41	24	17	80	21	35	172	0	3	0	0	6
NM_001243541	100653515	KIAA1731NL	-4.71204	26.2099	0.000368286	0.0288212	4	5	0	4	13	5	43	5	1	5	6	9	41	3	12	4	7	12	17	31	1	0	0	0	0
NM_001009608	128710	SLX4IP	-4.64234	24.9737	2.48986e-06	0.00127639	7	13	11	45	30	2	33	5	18	6	20	19	31	4	4	14	17	19	7	22	1	1	0	0	0
NM_006408	10551	AGR2	-4.63733	24.8871	0.000858833	0.0471086	2	9	0	1	3	0	3	11	5	33	5	896	0	1	0	6	5	3	21	2	3	5	0	38	0
NM_022145	64105	CENPK	-4.61819	24.5591	0.00089519	0.0482904	0	3	9	17	46	0	11	18	44	12	13	9	20	0	2	12	41	17	1	23	1	0	0	0	0
NR_038397	100628315	DNM3OS	-4.57926	23.9054	2.90976e-05	0.00586006	3	2	3	3	25	2	16	15	4	8	5	16	39	3	2	5	33	14	17	13	0	0	0	0	2
NM_002275	3866	KRT15	-4.46592	22.0991	0.000445511	0.0328397	686	474	1	63	576	200	657	50	1	14	703	85	151	50	164	1366	54	72	1949	399	56	5	0	39	53
NM_001258312	5136	PDE1A	-4.43317	21.6031	4.89548e-06	0.00212351	6	8	1	7	10	2	10	33	6	1	7	19	18	2	13	6	13	14	65	4	0	0	0	1	5
NM_001446	2173	FABP7	-4.38241	20.8563	2.37457e-05	0.00525106	40	21	0	144	225	85	254	52	4	43	45	13	354	35	78	67	132	104	104	40	5	0	0	0	3
NR_040115	23783	ANKRD62P1-PARP4P3	-4.35884	20.5183	0.000263554	0.0241656	18	13	0	29	39	11	21	10	4	10	38	1	26	1	8	4	13	28	43	0	1	0	0	0	2
NM_001281956	114784	CSMD2	-4.314	19.8904	8.94374e-05	0.0118668	1	12	7	6	18	5	10	17	12	3	8	19	26	0	16	21	34	57	13	1	0	0	0	0	3
NM_032532	84624	FNDC1	-4.28917	19.551	8.65322e-06	0.00325303	14	26	12	109	698	96	255	196	9	180	181	157	314	205	15	199	310	103	24	73	5	0	0	0	10
NM_198993	342667	STAC2	-4.2877	19.531	0.000154714	0.0179882	1	40	0	35	34	11	44	9	4	4	91	29	15	1	9	13	17	6	450	12	0	5	0	5	37
NM_001277115	8701	DNAH11	-4.14841	17.7336	3.89645e-06	0.00176545	14	22	4	24	124	10	48	28	38	16	16	10	38	0	26	31	37	64	212	17	0	6	0	3	12
NM_173495	139411	PTCHD1	-4.13613	17.5833	0.000475025	0.0338446	0	5	8	2	46	0	7	23	6	2	25	11	6	0	3	49	18	17	80	1	2	0	0	0	8
NM_033211	90355	C5orf30	-4.09837	17.129	7.2144e-06	0.00290586	7	15	1	17	38	10	62	56	6	17	21	7	59	0	14	44	27	26	201	38	2	2	0	2	15
NM_003458	8927	BSN	-4.06669	16.757	3.3686e-05	0.00629135	8	9	6	9	50	11	13	16	7	5	28	8	18	4	8	19	37	60	10	26	1	0	0	0	1
NM_018923	56103	PCDHGB2	-4.0202	16.2256	4.92288e-05	0.00804642	76	18	12	11	29	2	65	49	7	9	38	5	75	12	9	35	15	28	23	36	0	0	3	0	0
NM_022131	64084	CLSTN2	-3.99879	15.9866	1.12796e-05	0.0037415	5	33	12	3	3	8	21	41	42	13	8	17	101	6	8	15	26	22	718	8	14	11	2	5	48
NM_018685	54443	ANLN	-3.92448	15.184	0.000226784	0.0218605	9	19	8	133	307	30	92	27	9	127	49	28	237	0	9	30	71	82	21	37	1	3	0	1	0
NM_001463	2487	FRZB	-3.90139	14.9429	1.04146e-05	0.00355927	1	46	11	4	9	4	54	17	3	2	22	30	19	3	10	6	6	40	113	8	5	1	0	4	6
NM_002403	4237	MFAP2	-3.86941	14.6153	0.000137735	0.0163513	4	11	0	10	54	9	72	16	2	27	19	20	106	18	10	13	22	17	21	19	0	0	0	0	4
NM_014010	23245	ASTN2	-3.83354	14.2564	7.83445e-05	0.0109083	2	23	6	6	130	12	47	21	8	1	40	5	13	11	35	32	44	64	254	15	2	10	2	4	8
NR_002560	9298	SNORD31	-3.80804	14.0066	0.000733559	0.0428657	8	15	26	14	16	4	21	44	2	14	74	0	14	1	37	51	81	53	6	3	1	2	0	0	2
NM_203349	399694	SHC4	-3.76282	13.5744	0.000135287	0.0162316	117	24	2	265	982	63	146	278	12	107	39	7	126	103	88	341	153	103	268	180	1	2	2	4	25
NR_033849	100128338	FAM83H-AS1	-3.7539	13.4908	0.000797232	0.0447871	24	18	1	30	42	1	55	33	0	27	35	6	19	0	17	26	31	35	13	11	0	0	0	0	2
NR_001282	84054	PCDHB19P	-3.73748	13.3381	3.07716e-05	0.00601666	13	16	6	2	35	9	50	34	5	12	21	13	48	2	1	15	25	21	15	12	0	0	0	0	4
NM_001813	1062	CENPE	-3.69089	12.9142	6.51558e-05	0.00954322	16	20	12	155	209	12	48	32	96	46	49	22	137	6	13	43	69	54	9	21	4	0	0	0	1
NM_001282145	57502	NLGN4X	-3.65518	12.5985	0.000322901	0.0271969	2	16	18	3	11	12	5	12	3	0	48	10	29	6	0	9	12	14	79	5	6	0	2	0	4
NM_012112	22974	TPX2	-3.63141	12.3926	0.000899183	0.0482904	8	10	4	107	74	2	27	44	40	39	20	16	75	0	11	7	57	31	9	24	3	0	0	0	0
NR_015352	100130418	CECR7	-3.61738	12.2727	8.44044e-05	0.0114688	13	32	1	25	49	10	88	31	4	35	35	11	55	0	8	17	49	52	50	56	0	5	0	0	2
NM_018651	55888	ZKSCAN7	-3.59146	12.0542	1.33718e-05	0.00394763	11	12	2	10	11	6	42	16	6	20	25	23	24	2	11	21	24	32	13	15	2	2	0	0	0
NM_198174	57822	GRHL3	-3.59006	12.0424	4.02138e-05	0.00708643	4	30	2	31	59	7	33	29	7	26	8	7	51	10	2	8	22	21	55	30	0	2	0	2	4
NM_001193583	4897	NRCAM	-3.55756	11.7742	5.27161e-05	0.00818304	50	149	1	21	236	129	390	65	37	46	186	53	143	67	51	32	24	86	380	73	7	5	2	7	41
NM_020546	108	ADCY2	-3.53115	11.5607	0.000464928	0.0338288	2	9	4	11	18	9	16	89	2	1	15	18	23	3	11	50	22	28	25	0	1	1	0	1	3
NM_006167	4824	NKX3-1	-3.51786	11.4547	0.000637791	0.0394027	8	34	2	3	11	2	2	11	0	27	21	351	1	9	2	24	11	14	13	3	11	2	0	12	21
NM_001999	2201	FBN2	-3.49203	11.2514	0.000198173	0.0208335	1	10	20	14	92	30	27	92	12	8	21	113	12	30	24	15	21	34	15	13	0	1	2	0	18
NM_001843	1272	CNTN1	-3.47269	11.1016	8.91228e-05	0.0118668	11	66	17	6	36	37	10	42	16	3	47	51	15	17	24	4	20	28	911	2	21	23	8	36	38
NM_004883	9542	NRG2	-3.43173	10.7908	0.000371418	0.0288212	2	22	3	3	39	0	18	8	3	3	23	11	16	0	13	7	24	43	268	13	7	7	0	11	18
NM_173076	26154	ABCA12	-3.41968	10.701	7.28084e-05	0.0103941	19	8	9	24	76	13	13	37	6	18	17	10	37	0	11	32	35	30	14	9	2	0	0	0	3
NM_032279	84239	ATP13A4	-3.33973	10.1241	0.000874345	0.047637	2	19	4	3	4	3	31	4	6	9	41	29	37	0	4	15	6	15	121	2	5	0	1	14	0
NM_207435	400073	C12orf76	-3.32057	9.99062	3.97808e-05	0.00708643	27	10	6	13	28	3	26	20	11	13	25	5	30	0	11	7	16	29	81	16	3	2	2	4	1
NM_001407	1951	CELSR3	-3.30356	9.87351	0.000860469	0.0471086	14	6	2	9	42	7	32	15	13	13	21	14	12	0	11	13	50	49	5	12	0	0	0	0	3
NM_001190481	63967	CLSPN	-3.26679	9.62503	0.000547259	0.0379596	4	7	15	40	74	3	27	35	14	36	58	14	50	1	5	66	66	42	2	14	0	2	0	0	4
NM_032890	84976	DISP1	-3.23064	9.38685	5.8118e-05	0.00885749	6	18	6	6	17	9	33	6	21	18	17	6	29	2	5	25	24	39	86	25	7	1	0	0	9
NM_001142351	84620	ST6GAL2	-3.15277	8.89359	0.000477149	0.0338446	8	14	5	14	36	16	8	20	1	14	28	13	64	1	16	38	28	11	14	27	1	2	0	2	0
NM_007281	11341	SCRG1	-3.14342	8.83617	0.000612765	0.0389036	8	13	0	20	64	15	50	24	3	8	31	7	14	10	5	8	28	17	30	16	3	0	0	0	3
NM_032456	5099	PCDH7	-3.10976	8.6324	0.000459737	0.0336683	2	24	3	4	56	4	38	60	12	24	21	42	143	3	9	23	34	35	359	25	17	0	2	28	25
NM_001029864	85449	KIAA1755	-3.10347	8.59485	0.000223433	0.0217231	43	19	4	63	33	7	62	70	9	20	41	23	19	3	8	89	57	48	133	12	6	0	5	0	13
NM_001281789	255919	CNEP1R1	-3.0242	8.13532	5.19732e-05	0.00818304	9	14	9	15	28	2	26	27	20	8	13	22	33	0	14	6	25	18	18	15	5	0	0	2	2
NM_001129908	729085	FAM198A	-2.95886	7.77507	0.000614013	0.0389036	33	45	1	61	106	20	213	27	6	44	52	10	110	3	77	102	64	42	108	81	5	2	0	10	6
NM_001204870	8840	WISP1	-2.9541	7.74947	0.000218492	0.0214621	2	10	8	10	78	12	25	22	15	24	8	51	63	3	5	29	13	15	63	36	14	0	0	3	6
NM_198833	5271	SERPINB8	-2.92596	7.59981	0.000218845	0.0214621	15	13	13	6	37	1	5	23	25	7	9	21	35	10	11	7	11	21	14	8	3	0	0	1	7
NM_016343	1063	CENPF	-2.92377	7.58827	0.000927989	0.0484561	37	54	25	536	921	50	145	73	124	135	155	76	429	24	48	129	189	146	51	102	24	0	0	0	7
NM_007109	6941	TCF19	-2.87427	7.33234	7.72291e-05	0.0108874	13	17	12	28	39	8	21	26	26	17	26	10	31	0	10	5	32	28	67	12	5	2	2	0	10
NM_016548	51280	GOLM1	-2.86779	7.29948	3.54305e-05	0.00644493	64	101	6	112	226	51	157	146	34	97	78	953	326	28	87	94	73	139	56	88	38	11	15	31	75
NM_014729	9760	TOX	-2.79889	6.95902	0.000380437	0.0289904	8	9	24	8	19	8	22	17	34	32	9	16	16	13	10	5	25	24	9	14	0	3	2	3	4
NM_001013647	646851	FAM227A	-2.79856	6.95744	0.000664046	0.0400487	25	59	2	89	87	13	114	33	11	22	63	15	85	4	54	68	123	97	17	27	4	0	0	0	3
NM_004523	3832	KIF11	-2.77404	6.84022	0.000178939	0.019785	11	18	19	72	219	12	33	64	60	45	57	19	118	12	25	51	61	30	21	20	1	5	0	0	10
NM_004443	2049	EPHB3	-2.74553	6.70637	0.000167765	0.0191117	115	85	2	77	87	47	345	108	5	71	177	44	171	21	65	73	145	132	271	113	10	13	6	15	19
NR_027037	401093	MBNL1-AS1	-2.74156	6.68793	0.000548627	0.0379596	48	58	127	18	42	20	39	43	155	63	58	29	52	22	5	36	56	46	13	24	5	21	0	2	39
NR_026984	90784	LOC90784	-2.70686	6.52898	0.00091614	0.0484561	24	9	8	23	49	22	38	16	13	10	19	10	35	1	7	31	37	27	6	25	3	0	0	0	3
NR_026900	200058	FLJ23867	-2.66475	6.34119	0.000930704	0.0484561	21	18	0	27	46	4	55	21	6	26	30	37	29	1	17	25	35	24	129	7	3	2	6	13	6
NM_001008397	493869	GPX8	-2.65607	6.30315	0.000385478	0.0291773	23	13	3	37	83	10	73	33	6	42	64	64	99	10	9	32	38	28	24	46	14	0	0	2	3
NM_080743	135295	SRSF12	-2.64792	6.26764	0.00075816	0.0431845	20	20	11	45	54	11	57	6	20	11	17	6	73	12	13	16	35	10	18	21	2	2	0	0	6
NM_017415	26249	KLHL3	-2.64163	6.24037	0.000158463	0.0182362	31	18	45	9	26	9	33	56	41	6	22	26	19	2	15	18	27	45	9	16	2	4	0	12	8
NM_020716	57476	GRAMD1B	-2.63965	6.23182	0.000371067	0.0288212	4	9	6	12	10	6	10	39	12	5	20	19	15	3	17	26	15	49	45	9	4	5	0	6	1
NM_000082	1161	ERCC8	-2.62217	6.15677	0.000642853	0.0394027	37	19	1	18	49	1	25	12	7	16	17	25	26	12	2	33	26	24	25	13	2	4	0	0	6
NM_014858	9911	TMCC2	-2.61853	6.14122	0.000641364	0.0394027	12	22	5	27	46	0	23	20	7	8	11	9	28	9	6	7	18	16	34	20	0	2	1	3	6
NM_018322	55776	SAYSD1	-2.6036	6.07802	0.000323141	0.0271969	19	20	5	31	37	4	41	20	33	10	18	32	59	3	4	16	11	16	13	15	5	2	0	0	5
NM_001270974	54768	HYDIN	-2.59472	6.04074	0.000574835	0.0388047	61	45	11	10	41	29	158	47	20	74	63	25	117	15	75	200	190	196	165	43	5	22	4	4	10
NR_027642	100132724	DCAF13P3	-2.57071	5.94101	0.000631778	0.0394027	14	15	15	27	27	19	33	17	8	9	7	19	33	8	6	6	12	8	12	16	0	2	0	4	8
NM_001001436	388272	C16orf87	-2.53171	5.78257	0.000920429	0.0484561	12	12	22	23	39	5	40	5	25	22	40	19	27	1	5	26	34	17	4	8	2	5	0	4	3
NM_001160333	23114	NFASC	-2.52548	5.75764	0.000276028	0.0247547	10	36	10	7	14	20	31	48	16	8	43	40	22	10	17	11	41	56	440	16	29	10	5	22	73
NM_002871	5877	RABIF	-2.51061	5.69862	0.000933219	0.0484561	8	13	16	15	29	6	27	24	42	11	8	19	23	7	6	11	16	19	3	10	4	2	0	0	6
NM_001252226	10769	PLK2	-2.47928	5.57617	0.000936641	0.0484561	114	247	4	127	350	104	480	94	15	162	252	64	95	72	23	285	154	143	878	156	41	45	14	51	101
NM_145728	23336	SYNM	-2.44616	5.44962	0.000603765	0.0388066	159	435	24	268	252	100	282	916	88	232	644	215	282	183	89	121	161	172	2565	223	85	134	56	156	305
NM_007156	7789	ZXDA	-2.42922	5.38602	0.000935631	0.0484561	15	8	15	21	20	3	35	10	17	10	25	16	9	15	6	13	23	29	8	28	6	3	0	1	2
NM_003633	8507	ENC1	-2.429	5.38521	0.000140953	0.016559	47	173	20	267	389	113	275	137	12	124	402	78	224	27	93	200	229	203	246	155	34	11	3	16	34
NM_006129	649	BMP1	-2.40769	5.30623	0.0006056	0.0388066	2	24	5	23	46	19	47	40	6	26	18	32	58	12	22	28	16	19	35	43	5	1	0	2	14
NM_033201	89927	C16orf45	-2.38655	5.22907	0.000393379	0.0295768	9	40	5	7	21	5	40	23	6	10	21	31	24	9	23	19	16	6	74	23	9	3	0	7	14
NM_001040616	55180	LINS	-2.38284	5.21563	0.000629428	0.0394027	21	37	12	13	20	11	43	6	40	27	35	19	30	2	11	8	33	31	25	23	3	1	0	3	12
NM_003099	6642	SNX1	-2.36518	5.15218	3.40284e-05	0.00629135	272	286	97	186	368	140	657	258	186	191	406	174	292	84	230	577	408	223	1722	417	114	110	21	140	232
NM_016642	51332	SPTBN5	-2.35496	5.11582	0.000601846	0.0388066	22	26	3	3	13	7	55	20	15	15	10	28	31	21	5	46	29	53	99	24	8	5	1	8	17
NM_001546	3400	ID4	-2.28738	4.88168	0.000733174	0.0428657	266	196	25	161	999	49	386	293	20	192	782	115	508	273	112	244	271	212	616	130	36	45	15	65	53
NM_002349	4065	LY75	-2.27686	4.84624	0.00058298	0.0388066	49	25	56	27	47	8	71	46	48	28	22	31	35	24	2	27	54	17	9	46	6	5	1	14	15
NM_182633	349075	ZNF713	-2.25075	4.75932	0.000308573	0.0265655	13	19	1	20	48	12	67	38	17	17	42	17	37	7	18	42	53	38	31	18	5	2	2	1	4
NM_152522	151188	ARL6IP6	-2.19092	4.56595	0.000667762	0.0400586	9	23	18	29	42	14	50	27	15	10	11	14	53	12	8	30	27	25	11	15	2	0	0	9	6
NM_001198967	4776	NFATC4	-2.16089	4.47189	0.000597075	0.0388066	9	15	3	10	39	6	68	32	6	21	13	41	32	7	15	34	31	37	43	37	5	8	0	4	12
NM_015617	26108	PYGO1	-2.13802	4.40159	0.000267538	0.024333	50	40	12	88	142	26	120	128	16	20	87	97	188	28	55	39	83	48	54	29	11	11	4	4	22
NM_134424	5893	RAD52	-2.10268	4.29506	0.000254491	0.0237202	41	26	17	31	40	11	100	30	32	16	23	15	69	9	15	65	60	40	25	29	7	2	0	5	9
NM_001142784	3590	IL11RA	-2.06759	4.19185	0.000598207	0.0388066	8	24	20	6	14	2	30	41	12	4	11	34	24	5	4	6	24	24	22	19	4	5	3	4	13
NM_145037	91775	NXPE3	-2.04189	4.11785	0.000375663	0.0288212	47	54	93	59	49	35	49	119	151	33	26	95	86	16	22	25	80	46	120	29	34	24	1	26	58
NM_001205028	56890	MDM1	-1.96697	3.90946	0.000601313	0.0388066	39	21	16	38	42	20	61	14	48	16	46	22	42	21	9	26	37	55	29	23	9	2	0	7	11
NM_003112	6671	SP4	-1.79778	3.47685	0.000935119	0.0484561	42	37	45	40	68	36	89	80	98	31	68	37	70	44	22	37	46	28	42	19	17	10	0	15	26
NM_000297	5311	PKD2	-1.51122	2.85051	0.000258391	0.0238864	92	76	50	43	132	45	171	67	59	58	132	140	196	38	29	76	106	89	184	116	41	32	13	44	67
NM_006806	10950	BTG3	2.08989	0.234899	0.000962247	0.0495535	20	50	0	38	67	26	43	17	8	41	51	13	48	34	7	39	43	38	8	33	20	21	10	25	53
NM_019027	54502	RBM47	2.24316	0.211223	0.000477136	0.0338446	188	370	16	59	177	42	140	93	53	150	188	121	201	181	46	128	90	190	40	39	177	359	61	280	278
NM_017515	54733	SLC35F2	2.24548	0.210883	0.00047103	0.0338446	35	87	9	38	34	18	44	20	24	30	22	19	105	30	9	29	29	41	7	17	18	63	20	92	54
NM_001136108	203069	R3HCC1	2.2954	0.203711	0.000753508	0.0431374	23	47	0	20	42	6	23	35	8	17	18	14	43	12	9	35	27	14	0	30	14	11	5	39	30
NM_181335	23779	ARHGAP8	2.43011	0.185551	0.000777905	0.0440865	14	47	3	10	37	3	73	29	6	30	19	5	33	22	7	29	38	45	4	18	5	25	10	19	43
NM_002168	3418	IDH2	2.43815	0.18452	0.000207915	0.0208335	23	66	2	44	34	22	108	108	3	32	55	7	89	21	14	29	24	33	15	38	37	43	6	53	74
NM_199187	3875	KRT18	2.52698	0.173502	0.00072604	0.0428657	30	100	2	16	46	3	26	22	2	11	24	12	14	12	17	44	19	23	9	18	29	28	13	69	53
NM_002569	5045	FURIN	2.55642	0.169997	0.000347996	0.0284399	53	360	4	36	74	51	177	59	17	65	52	64	119	92	27	109	94	77	38	51	89	163	52	268	293
NM_001453	2296	FOXC1	2.62664	0.16192	0.000236118	0.0225673	188	406	1	180	215	62	275	99	14	190	198	69	213	161	70	530	197	121	50	91	147	179	68	269	319
NM_018718	95681	CEP41	2.63942	0.160493	1.80325e-05	0.00477178	38	65	7	29	48	13	49	19	23	16	50	8	27	27	26	44	56	43	5	18	15	36	24	37	81
NM_001338	1525	CXADR	2.69851	0.154053	0.000279677	0.0248362	211	121	4	189	158	34	265	62	3	137	274	33	346	100	44	156	228	112	13	96	150	49	24	121	112
NM_016029	51635	DHRS7	2.72847	0.150886	0.000741613	0.0428919	20	232	7	33	58	24	43	46	42	19	27	32	95	81	12	47	42	15	24	17	43	216	52	82	173
NM_001282211	57447	NDRG2	2.76654	0.146956	0.000541952	0.0379596	396	1093	19	213	393	167	405	344	30	125	351	174	369	480	169	230	157	385	91	159	191	610	202	927	544
NM_002031	2444	FRK	2.94396	0.129951	0.000336754	0.027956	44	54	2	19	60	15	53	20	6	15	19	18	46	32	8	24	42	20	6	13	32	18	60	36	28
NM_021244	58528	RRAGD	3.02832	0.12257	0.000359742	0.0288212	64	298	8	47	58	48	36	121	14	9	86	31	43	93	10	51	28	53	29	20	98	183	43	284	216
NM_001085	12	SERPINA3	3.1423	0.113259	0.000578044	0.0388047	241	173	3	183	238	142	271	55	60	83	114	72	242	155	18	109	40	122	12	48	544	43	13	88	486
NM_005110	9945	GFPT2	3.1436	0.113157	5.01094e-05	0.00807334	20	48	0	17	36	15	32	48	18	14	28	10	36	21	7	6	9	17	5	28	14	16	24	18	113
NM_003047	6548	SLC9A1	3.17327	0.110853	8.98156e-06	0.00326755	31	156	6	13	40	56	44	43	31	38	46	19	41	71	16	102	55	44	21	44	60	119	54	150	217
NR_002995	677842	SNORA76C	3.18159	0.110216	0.000574873	0.0388047	29	18	3	13	14	21	23	58	4	4	97	8	33	0	31	49	38	85	6	9	11	68	9	43	145
NM_001135099	7113	TMPRSS2	3.19232	0.1094	0.000187139	0.0203979	66	147	0	15	21	22	64	41	4	20	54	29	46	29	17	95	28	36	1	16	58	46	28	72	158
NM_017688	54836	BSPRY	3.20759	0.108248	0.000597211	0.0388066	46	123	0	40	23	12	29	6	1	24	108	19	60	15	4	36	42	51	1	21	32	47	11	92	72
NM_005099	9507	ADAMTS4	3.2076	0.108247	0.000207481	0.0208335	8	62	1	71	58	17	60	156	96	37	44	6	75	27	6	19	17	44	11	18	14	23	23	17	198
NM_004572	5318	PKP2	3.2864	0.102494	2.24837e-05	0.00516282	56	247	1	22	46	44	64	16	24	34	80	42	69	58	24	92	46	86	14	29	175	136	21	200	288
NM_005952	4501	MT1X	3.35518	0.0977213	0.000896989	0.0482904	4	53	0	20	16	8	37	34	8	2	18	9	68	15	2	11	7	9	2	5	14	50	6	3	113
NM_004200	9066	SYT7	3.46411	0.0906149	2.20464e-06	0.00119145	31	101	3	20	11	34	61	26	6	29	61	12	56	32	13	26	30	71	7	19	55	53	24	118	116
NM_004000	1117	CHI3L2	3.87671	0.0680759	7.27478e-05	0.0103941	6	65	2	4	10	2	8	11	28	5	34	13	23	12	3	17	4	39	5	0	151	27	15	111	158
NM_001243080	2001	ELF5	4.09329	0.0585863	0.000276564	0.0247547	113	275	0	84	181	10	81	6	5	55	226	25	110	93	28	71	24	88	0	7	121	102	25	121	215
NM_024539	79589	RNF128	4.41991	0.046717	0.000703764	0.041774	6	66	0	6	23	0	8	20	3	11	24	7	10	27	0	4	8	18	0	0	25	19	15	102	34
NM_001077197	50940	PDE11A	4.54611	0.0428041	0.000299851	0.026106	7	44	0	13	2	7	7	14	2	1	13	1	3	11	3	33	33	40	1	3	6	17	10	9	28
NR_003030	692057	SNORD12	4.64238	0.0400411	0.000832251	0.0460104	9	8	0	10	12	2	14	25	0	3	69	0	5	0	7	9	33	45	1	8	4	10	4	5	27
NR_102334	256764	WDR72	4.70248	0.0384073	0.000571758	0.0388047	2	83	4	3	6	19	28	5	1	18	5	12	5	35	32	10	24	31	0	0	87	36	45	287	182
NM_001166061	2743	GLRB	4.74655	0.0372517	9.37162e-05	0.0121486	10	29	0	6	10	2	10	13	7	4	26	1	23	12	0	17	8	27	0	3	11	7	0	21	16
NM_001085429	155006	TMEM213	4.81612	0.035498	0.000198261	0.0208335	29	83	0	1	2	7	47	6	6	1	30	4	2	16	0	9	11	20	5	8	43	21	30	177	71
NM_198505	344905	ATP13A5	4.83672	0.0349947	1.60398e-05	0.00441212	1	37	1	4	3	6	20	5	9	12	42	0	5	10	3	7	18	38	2	22	31	7	13	49	44
NM_020179	56935	SMCO4	4.88515	0.0338394	4.18528e-05	0.00726179	8	34	0	8	7	2	13	6	3	6	21	2	9	13	11	6	13	10	0	3	3	28	13	24	9
NM_001039	6340	SCNN1G	5.03572	0.0304857	0.000104255	0.0130643	35	43	0	78	147	96	298	84	1	153	27	2	46	83	16	86	105	130	0	234	29	3	0	43	53
NM_016639	51330	TNFRSF12A	5.04994	0.0301869	4.48549e-05	0.00755524	22	21	0	10	73	20	4	50	5	17	47	1	29	14	18	11	17	19	0	26	10	2	1	5	63
NM_018646	55503	TRPV6	5.20067	0.027192	0.000117904	0.0144535	4	89	1	1	2	14	8	17	3	5	7	0	4	30	3	36	17	12	2	6	9	62	16	34	71
NM_017422	51806	CALML5	5.9694	0.0159599	1.95684e-05	0.00490428	10	54	0	40	19	10	14	12	0	45	47	0	31	4	0	4	21	17	1	6	12	7	8	32	74
NM_000492	1080	CFTR	6.12012	0.0143768	1.36511e-05	0.00394763	9	140	0	4	6	9	30	7	6	59	7	6	2	20	10	17	35	56	1	3	257	25	5	320	152
NM_005794	10202	DHRS2	6.68143	0.00974289	0.00063403	0.0394027	0	22	0	1	2	16	1	4	1	0	8	0	1	6	1	4	2	10	1	0	0	3	21	41	142
NM_017678	54827	NXPE4	6.81389	0.00888821	0.000291411	0.025676	8	57	0	3	6	7	16	4	1	4	5	1	8	77	2	6	14	47	0	0	0	53	20	78	23
NM_033303	148	ADRA1A	7.3339	0.00619835	0.00010926	0.013541	0	24	0	6	2	1	3	6	3	0	6	0	3	10	4	6	6	9	0	0	4	16	2	14	32
NM_206966	389336	C5orf46	8.24845	0.00328827	2.54101e-07	0.000281127	60	30	0	13	47	6	23	9	0	11	20	0	25	15	6	6	16	12	0	9	8	15	7	52	32
NM_214711	401137	PRR27	11.1863	0.000429138	0.00030092	0.026106	10	304	1	2	2	56	4	5	2	1	5	0	0	911	8	4	10	437	0	0	919	1068	311	2216	1024
NM_001322	1470	CST2	12.7872	0.00014147	2.24914e-05	0.00516282	0	7	0	1	2	3	1	4	2	0	5	0	5	81	1	4	2	180	0	0	5	332	65	2225	55
NM_002257	3816	KLK1	13.0029	0.000121829	9.2503e-05	0.0121308	0	370	0	1	2	118	1	4	0	1	5	0	2	137	0	4	2	16	0	0	66	165	238	1632	903
NM_080574	140683	BPIFA2	13.5368	8.4141e-05	0.000200391	0.0208335	2	991	0	1	2	162	2	9	0	0	5	0	4	352	0	4	4	366	0	0	8	477	115	2792	1643
NM_001900	1473	CST5	13.731	7.35467e-05	0.000740481	0.0428919	0	1464	0	1	2	7	2	4	1	0	5	0	0	849	0	4	2	148	0	0	5	2507	233	1783	275
NM_001898	1469	CST1	14.0094	6.06391e-05	9.35304e-06	0.00329636	0	71	0	1	2	6	4	9	0	6	8	0	0	6	3	4	11	288	0	0	93	55	118	6073	15
